# Supplementary material
Source: publisher figshare collection journal article supplement (https://acs.figshare.com/ndownloader/files/15597545)
Supplement: Supplementary file 1 [file 15597545]

**Nonthermal Plasma Assisted Catalytic Oxidation of Carbon Monoxide  
over CuO<sub>x</sub>@ $\gamma$ -Al<sub>2</sub>O<sub>3</sub>: Understanding Plasma Modification of Catalyst  
and Plasma-Catalyst Synergy**

Jian Zhang, Xiaohong Yao, Qi Shao, Bowen Xu, Xiaoyang Liang, Chao Long\*

State Key Laboratory of Pollution Control and Resource Reuse, School of the  
Environment, Nanjing University, 163 Xianlin Avenue, Nanjing 210023, China

\*Corresponding author. Phone: +86 25 89680380, E-mail: clong@nju.edu.cn

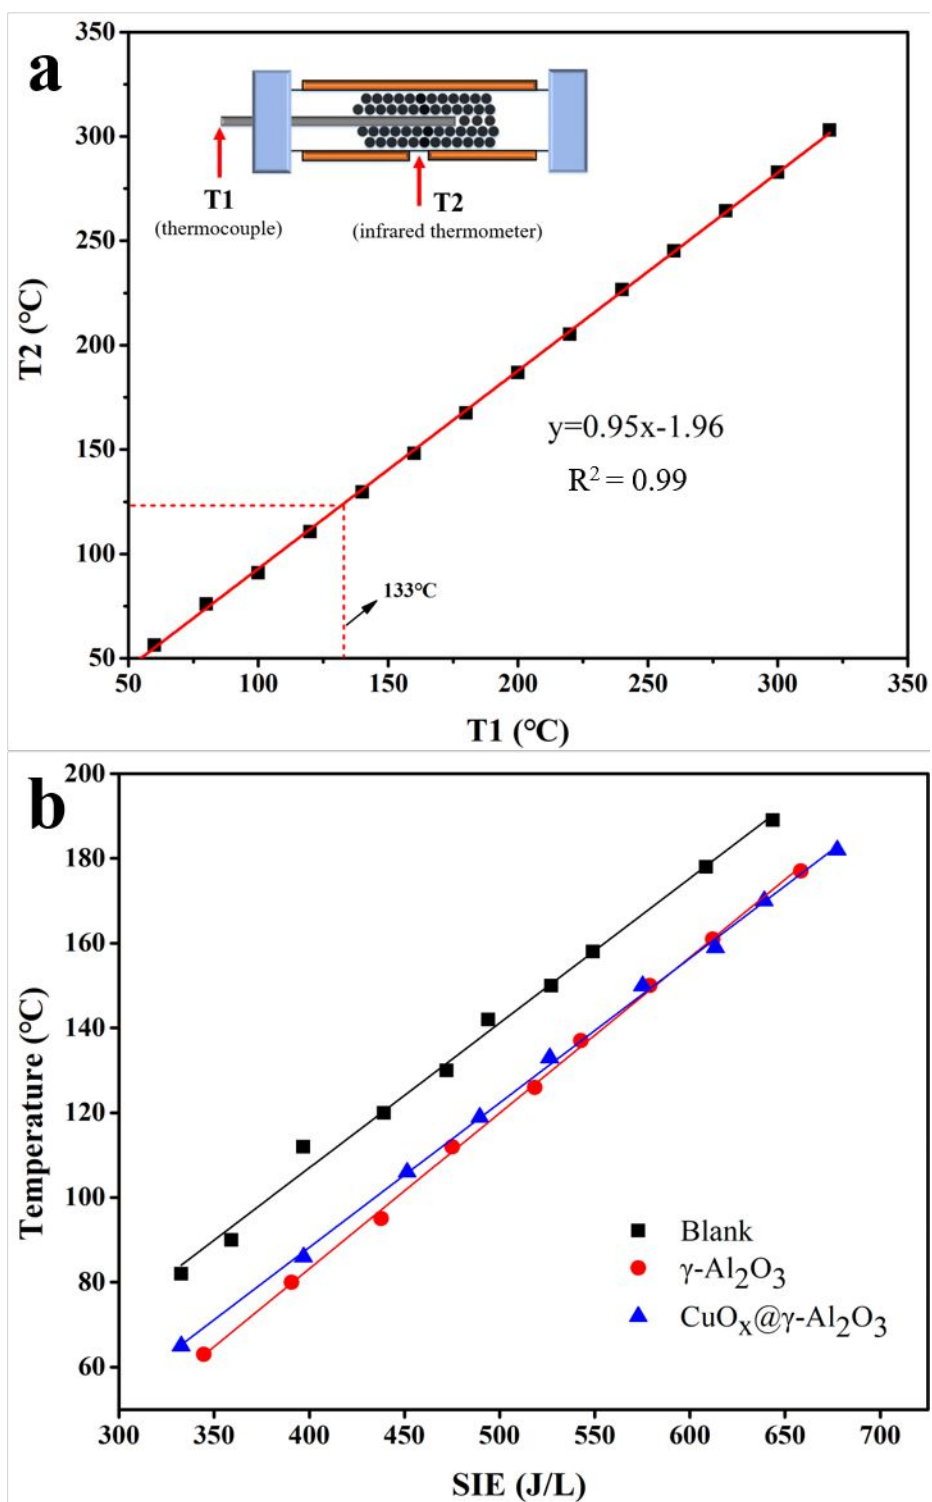

**Figure S1.** (a) The calibration curve between the outside wall temperature (T2) of reactor and the catalyst bed temperature (T1); (b) temperature change as a function of SIE in the plasma-catalytic system

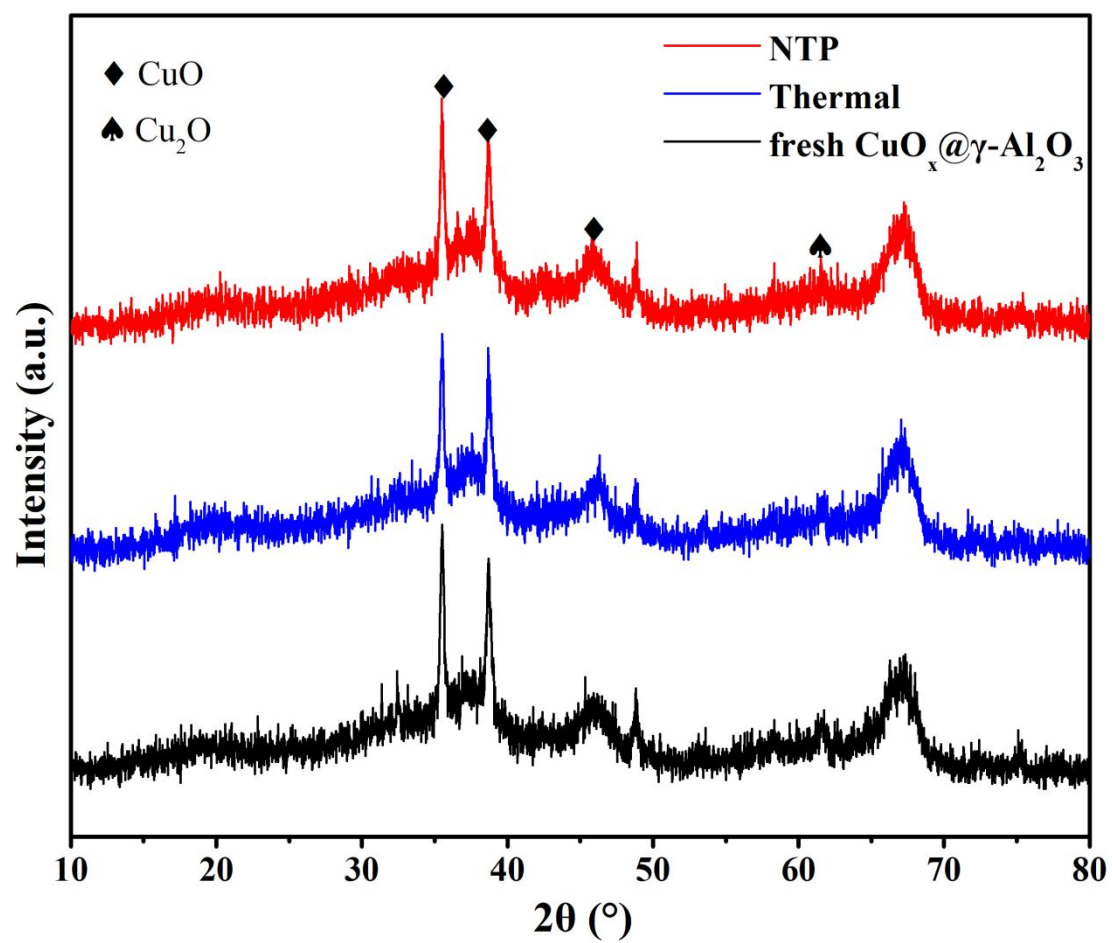

**Figure S2.** XRD patterns of the  $\text{CuO}_x@ \gamma\text{-Al}_2\text{O}_3$  after 10h reaction under wet condition

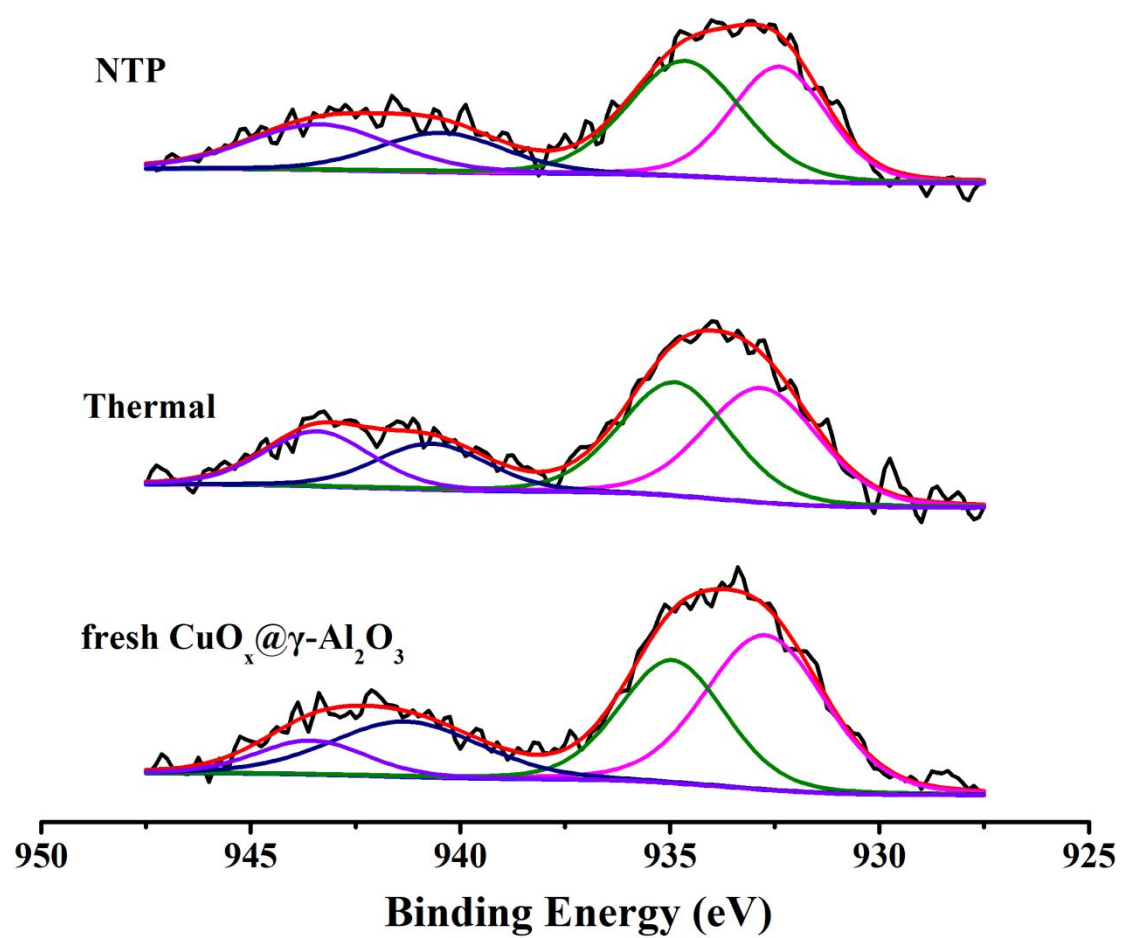

**Figure S3.** Fitted Cu 2p XPS spectrum of the  $\text{CuO}_x@ \gamma\text{-Al}_2\text{O}_3$  after 10h reaction under wet condition

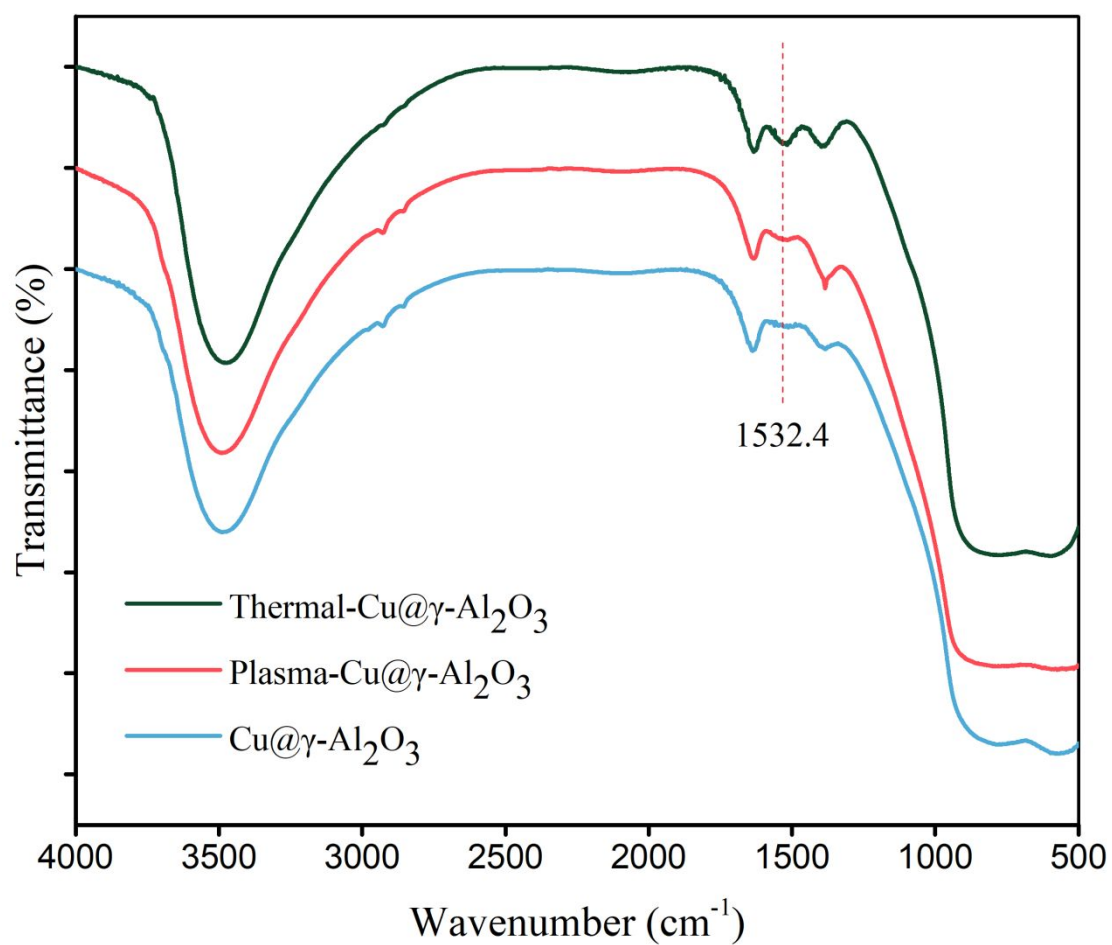

**Figure S4.** FT-IR spectrum of CuO<sub>x</sub>@γ-Al<sub>2</sub>O<sub>3</sub> catalysts after the thermal and plasma catalytic reaction under wet condition (RH80%)

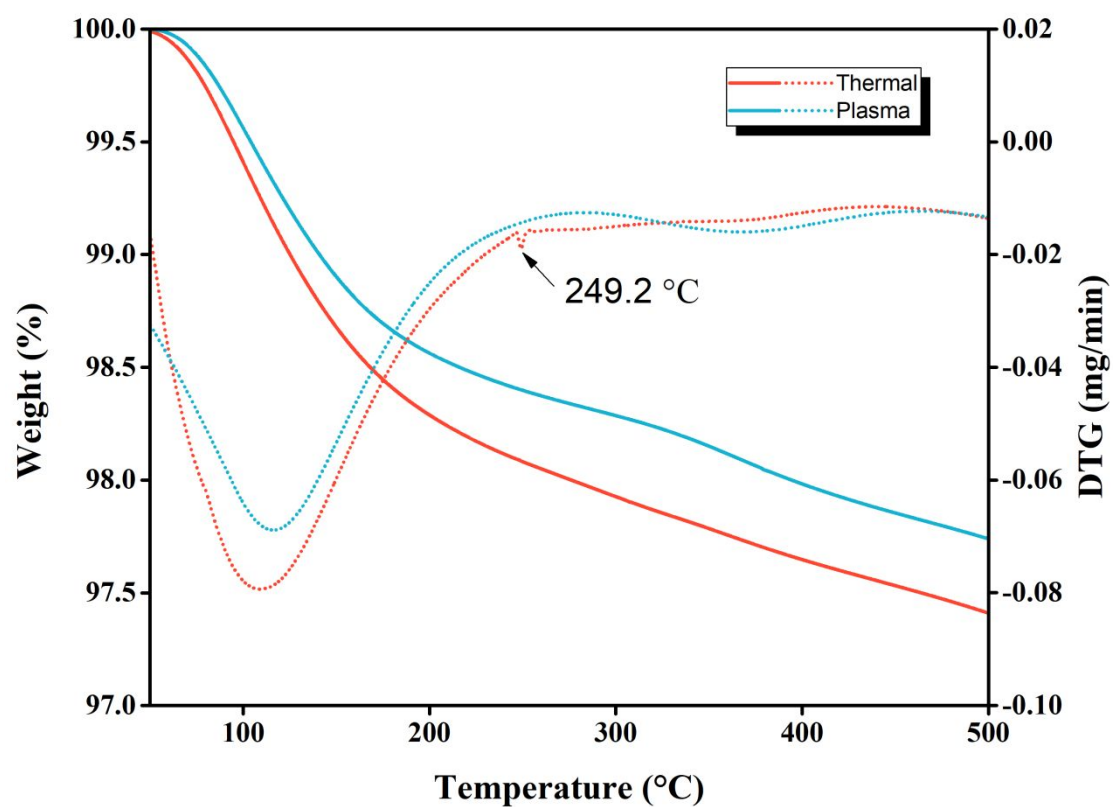

**Figure S5.** TG–DTG curves of  $\text{CuO}_x@ \gamma\text{-Al}_2\text{O}_3$  catalysts after the thermal and plasma catalytic reaction under wet condition (RH=80%)

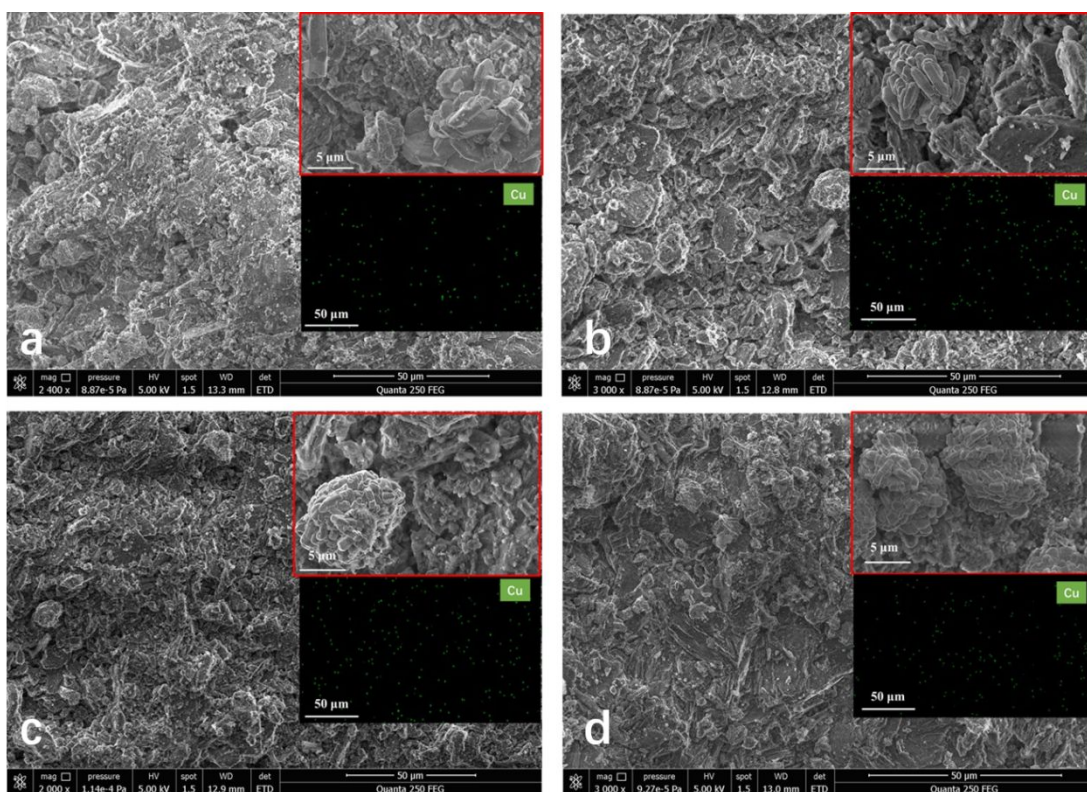

**Figure S6.** SEM images and of the corresponding Cu element mapping of (a) virgin  $\text{CuO}_x@ \gamma\text{-Al}_2\text{O}_3$  ; (b)  $\text{CuO}_x@ \gamma\text{-Al}_2\text{O}_3\text{-5}$ ; (c)  $\text{CuO}_x@ \gamma\text{-Al}_2\text{O}_3\text{-30}$ ; (d)  $\text{CuO}_x@ \gamma\text{-Al}_2\text{O}_3\text{-60}$
